# Supplementary material for: Reactions to a Hypothetical Menthol Cigarette Ban among Sexual- and Gender-Minoritized Communities: A Concept Mapping Study
Source: MDPI journal article supplement (doi:10.3390/ijerph20053891), 2023-02-22
Supplement: s1 [file s1]

### Supplementary Measure A1: Demographic Questions.

The following are the demographic questions employed in the study survey. Note that U.S. region was determined from participants' reporting of their state of residence.

#### Sexual Orientation

Your sexual orientation is: *[please select all that apply]*

1. Asexual
2. Bisexual/ Bi
3. Demisexual
4. Down-low
5. Gay/ homosexual
6. Homoflexible
7. Lesbian
8. Pansexual/ Polysexual/ Omnisexual
9. Queer
10. Questioning
11. Same gender loving
12. Straight/ heterosexual
13. A different orientation (please share your identity: \_\_\_\_\_ )

#### Gender Identity

Your gender identity is: *[please select all that apply]*

1. Agender
2. Bigender
3. Cisgender man
4. Cisgender woman
5. Demiboy
6. Demigirl
7. Genderqueer
8. Genderflux
9. Genderfluid
10. Man
11. Neutrois
12. Non-binary
13. Pangender
14. Queer
15. Questioning
16. Transgender man
17. Transgender woman
18. Transmasculine
19. Transfeminine
20. Two-spirit
21. Woman
22. A different identity (please share your identity: \_\_\_\_\_)

## Ethnic Identity

What ethnic group(s) do you consider yourself to be? *[please select all that apply]*

1. African or Caribbean
2. Alaskan Native
3. American Indian
4. Asian or South Asian
5. Black or Brown American
6. European or White
7. Hispanic
8. Jewish
9. Latino/a/e
10. Middle Eastern
11. Native Hawaiian
12. Pacific Islander
13. Other (what other ethnic group(s) do you identify with? \_\_\_\_\_)

## Income

What is your best estimate of your total household income from all sources last year, before taxes?

1. \$0 – \$19,999
2. \$20,000 – \$39,999
3. \$40,000 – \$59,999
4. \$60,000 – \$79,999
5. \$80,000 – \$99,999
6. \$100,000 – \$119,999
7. \$120,000 – \$139,999
8. \$140,000 – \$159,999
9. \$160,000 – \$179,999
10. \$180,000 – \$199,999
11. \$200,000+

## Health Insurance

Do you have health insurance?

0. No
1. Yes, public insurance (includes: Military insurance (Tricare), Medicaid, Medicare, veterans benefits)
2. Yes, private insurance (includes: Plans through employers, the Marketplace, parents, and universities; federal employee plans)
3. I'm not sure
